# Supplementary material
Source: PubMed Central journal article supplement (PMC1976202)
Supplement: pnas_0702572104_1.pdf [file pnas_0702572104_1.pdf]

RPP8 1 MAEAFVFSFGL EKLWDLLSRESERLQGVDEQITDGLKRQLRSLQSLKADADAKKHGSDRVRN  
RCY 1 MAEGFVFSFGLQKLDWLLSRESERLQGIDEQLDGLKRQLRSLQSLKADADAKKHGSDRVRN  
HRT 1 MAEAFVFSFGL EKLWDLLSRESERLQGIDEQLDGLKRQLRSLQSLKADADAKKHGSDRVRN  
LOV1 1 MAEGVVLFGVHKLWELLNRESARLNGIGEQQVDGLKRQLGR LQSLKADADAKKHESERVN  
Col-0 1 MAEGVVLFGVHKLWELLNRESARLNGIGEQQVDGLKRQLGR LQSLKADADAKKHESERVN

RPP8 61 FLEDVKDLVFDAEDIIESYVLNKLGRGEGKGVKKHVRRLARFLTDRHKVASDIEGITKRIS  
RCY 61 FLEDVKDLVFDAEDIIESYVLNKLGRGEGKGVKKHVRRLARFLTDRHKVASDIEGITKRIS  
HRT 61 FLEDVKDLVFDAEDIIESYVLNKLGRGEEKGIKKHVRRLACFLTDRHKVASDIEGITKRIS  
LOV1 61 FLEDV<sup>R</sup>D<sup>I</sup>V<sup>V</sup>DAEDIIES<sup>F</sup>L<sup>L</sup>N<sup>E</sup>F<sup>R</sup>T<sup>K</sup>E<sup>K</sup>G<sup>I</sup>K<sup>K</sup>H<sup>A</sup>R<sup>R</sup>L<sup>A</sup>C<sup>F</sup>L<sup>V</sup>D<sup>R</sup>R<sup>K</sup>F<sup>A</sup>S<sup>D</sup>I<sup>K</sup>G<sup>I</sup>T<sup>K</sup>I<sup>S</sup>  
Col-0 61 FLEDV<sup>R</sup>D<sup>I</sup>V<sup>V</sup>DAEDIIES<sup>F</sup>L<sup>L</sup>N<sup>E</sup>F<sup>R</sup>T<sup>K</sup>E<sup>K</sup>G<sup>I</sup>K<sup>K</sup>H<sup>A</sup>R<sup>R</sup>L<sup>A</sup>C<sup>F</sup>L<sup>V</sup>D<sup>R</sup>R<sup>K</sup>F<sup>A</sup>S<sup>D</sup>I<sup>K</sup>G<sup>I</sup>T<sup>K</sup>I<sup>S</sup>---

RPP8 121 DVIGEMQSF<sup>G</sup>IQQ--IIDGVRSLSLQERQ<sup>R</sup>V<sup>Q</sup>REIROQTYPDSS<sup>E</sup>SDLVGVEQ<sup>S</sup>V<sup>K</sup>ELVGH<sup>L</sup>  
RCY 121 EVIGEMQSF<sup>G</sup>IQQ--IIDG<sup>C</sup>RSLSLQERQ--REIROQTYPDSS<sup>E</sup>SDLVGVEQ<sup>S</sup>V<sup>K</sup>ELVGH<sup>L</sup>  
HRT 121 EVIGEMQSL<sup>G</sup>IQQQIIDG<sup>C</sup>RSLSLQERQ<sup>R</sup>V<sup>Q</sup>REIROQTYPDSS<sup>E</sup>SDLVGVEQ<sup>S</sup>V<sup>T</sup>ELV<sup>C</sup>H<sup>L</sup>  
LOV1 121 EVIG<sup>G</sup>M<sup>K</sup>S<sup>L</sup>G<sup>I</sup>Q<sup>E</sup>--IIDG<sup>A</sup>S<sup>S</sup>M<sup>S</sup>LQERQ<sup>R</sup>E<sup>Q</sup>K<sup>E</sup>I<sup>R</sup>O<sup>T</sup>F<sup>A</sup>N<sup>S</sup>SESDLVGVEQ<sup>S</sup>V<sup>E</sup>ALAG<sup>H</sup>L  
Col-0 -----

RPP8 180 VENDVHQVVS IAGMGGIGKTTLARQVFHDLVRRHFDGFAWCVSQQFTQKHVWQRILQE  
RCY 177 VENDVHQVVS IAGMGGIGKTTLARQVFHDLVRRHFDGFAWCVSQQFTQKHVWQRILQE  
HRT 181 VENDVHQVVS IAGMGGIGKTTLARQVFHDLVRRHFDGFAWCVSQQFTQKHVWQRILQE  
LOV1 180 VEND<sup>N</sup>I<sup>Q</sup>VVS I<sup>S</sup>GMGGIGKTTLARQVFH<sup>D</sup>M<sup>V</sup>Q<sup>R</sup>HFDGFAW<sup>F</sup>V<sup>S</sup>QQFTQKHVWQR<sup>I</sup>W<sup>Q</sup>E  
Col-0 -----

RPP8 240 LOPHDGDILQMDEYALQ<sup>R</sup>K<sup>L</sup>F<sup>O</sup>LLEA<sup>G</sup>K<sup>Y</sup>L<sup>V</sup>V<sup>L</sup>DDVW<sup>K</sup>KEDWD<sup>V</sup>I<sup>K</sup>AVFPRKRGWKMLLT  
RCY 237 LOPHDGDILQMDEYALQ<sup>R</sup>K<sup>L</sup>F<sup>O</sup>LLEA<sup>G</sup>R<sup>Y</sup>L<sup>V</sup>V<sup>L</sup>DDVW<sup>K</sup>KEDWD<sup>R</sup>I<sup>K</sup>AVFPRKRGWKMLLT  
HRT 241 LOPHDGDILQMDESAL<sup>Q</sup>R<sup>K</sup>L<sup>F</sup>OLLET<sup>G</sup>R<sup>Y</sup>L<sup>V</sup>V<sup>L</sup>DDVW<sup>K</sup>KEDWD<sup>R</sup>I<sup>K</sup>AVFPRKRGWKMLLT  
LOV1 240 LQ<sup>P</sup>Q<sup>N</sup>G<sup>D</sup>I<sup>S</sup>H<sup>M</sup>D<sup>E</sup>H<sup>I</sup>L<sup>O</sup>G<sup>K</sup>L<sup>F</sup>K<sup>L</sup>L<sup>E</sup>T<sup>G</sup>R<sup>Y</sup>L<sup>V</sup>V<sup>L</sup>DDVW<sup>K</sup>E<sup>D</sup>WD<sup>R</sup>I<sup>K</sup>AVFPRKRGWKMLLT  
Col-0 -----

RPP8 300 SRNEGVGIHADPTCLTFRASILNPEESWKL<sup>C</sup>ERIVFPRRDET---EVR<sup>L</sup>D<sup>E</sup>E<sup>M</sup>EAMG<sup>K</sup>E  
RCY 297 SRNEGVGIHADPTCLTFRASILNPEESWKL<sup>C</sup>ERIVFPRRDET---EVR<sup>L</sup>D<sup>E</sup>E<sup>M</sup>EAMG<sup>K</sup>E  
HRT 301 SRNEGVGIHADPTCLTFRASILNPEESWKL<sup>C</sup>ERIVFPRRDET---EVR<sup>L</sup>D<sup>E</sup>E<sup>M</sup>EAMG<sup>K</sup>E  
LOV1 300 SRNEGVGIHADPKS<sup>F</sup>G<sup>F</sup><sup>K</sup>TRIL<sup>T</sup>PEESWKL<sup>C</sup>E<sup>K</sup>IVFHRRDETGTLS<sup>E</sup>V<sup>R</sup><sup>V</sup>D<sup>E</sup>D<sup>E</sup>AMG<sup>K</sup>E  
Col-0 -----

RPP8 356 MVTHCGGLPLAVKVLGGLLANKHTVPEWKRVS<sup>D</sup>NIGSQIVGGS<sup>C</sup>LDDNSLNSVYRILSLS  
RCY 353 MVTHCGGLPLAVK<sup>A</sup>LGGLLANKHTVPEWKRVS<sup>D</sup>NIGSQIVGGS<sup>C</sup>LDDNSLNSVYRILSLS  
HRT 357 MVTHCGGLPLAVKVLGGLLANKHTVPEWKRVS<sup>D</sup>NIGSQIVGGS<sup>C</sup>LDDNSLNSVYRILSLS  
LOV1 360 MVT<sup>C</sup>CGGLPLAVKVLGGLL<sup>A</sup>T<sup>K</sup>H<sup>T</sup>VPEWKRVS<sup>D</sup>NIG<sup>P</sup>H<sup>L</sup>A<sup>G</sup>RS<sup>S</sup>LDDN<sup>-</sup>LNS<sup>T</sup>Y<sup>R</sup>V<sup>L</sup>SLS  
Col-0 -----

RPP8 416 YEDLPTHLK<sup>H</sup>R<sup>F</sup>L<sup>F</sup>LAHFPEY<sup>S</sup>K<sup>I</sup>SAYD<sup>L</sup>F<sup>N</sup>YWA<sup>V</sup>EG<sup>I</sup>Y---DGST<sup>I</sup>Q<sup>D</sup>S<sup>G</sup>EY<sup>L</sup>EELV  
RCY 413 YEDLPTHLK<sup>H</sup>C<sup>F</sup>L<sup>Y</sup>LAHFPE<sup>D</sup>S<sup>K</sup>IYR<sup>H</sup>G<sup>L</sup>F<sup>N</sup>YWA<sup>V</sup>EG<sup>I</sup>Y---DGST<sup>I</sup>E<sup>D</sup>S<sup>G</sup>EY<sup>L</sup>EELV  
HRT 417 YEDLPTHLK<sup>H</sup>R<sup>F</sup>L<sup>F</sup>LAHFPE<sup>D</sup>S<sup>K</sup>IT<sup>T</sup>Q<sup>E</sup>L<sup>F</sup>Y<sup>W</sup>AA<sup>E</sup>EG<sup>I</sup>Y---DGST<sup>I</sup>E<sup>D</sup>S<sup>G</sup>EY<sup>L</sup>EELV  
LOV1 419 YEDL<sup>P</sup>M<sup>C</sup>L<sup>K</sup>H<sup>C</sup><sup>F</sup>L<sup>Y</sup>LAHFPE<sup>Y</sup>Y<sup>E</sup>I<sup>H</sup>V<sup>K</sup>R<sup>L</sup>F<sup>N</sup>Y<sup>L</sup>A<sup>E</sup>GI<sup>T</sup>SS<sup>D</sup>DG<sup>T</sup>I<sup>Q</sup>D<sup>K</sup>G<sup>E</sup>D<sup>Y</sup>L<sup>E</sup>E<sup>L</sup>A  
Col-0 -----

RPP8 472 RRNLVIADNRYLSSHSKNCQMHDMREVCLSKAKEENFLQI IKDPTS TSTINAQSPRSR  
RCY 469 RRNLVIADNKNLDWHSKYCQMHDMREVCLPKAKEENFLQI IKDPTCTSTINAQSPRSR  
HRT 473 RRNLVIADNKYLRVHSKYCQMHDMREVCLSKAKEENFLQI IKDPTSISTINAQSPRRSR  
LOV1 479 RRNMLTIDKNYMF LRKKHCQMHDMREVCLSKAKEENFLQI IKDPTSISTINAQSPRRSR  
Col-0 -----

RPP8 532 RLSIHS GKAFHILGHKNNTKVRS LIVW---DEDFGIRSAS-VFHNLTLLRVLDLYVVKFE  
RCY 529 RLSIHS GKAFHILGHKNNAKVRS LIVLRLKEEDY WIRSAS-VFHNLTLLRVLDLSVVKFE  
HRT 533 RLSIHRGKAFQILGHRNNAKVRS LIVSRFK EEDFWIRSAS-VFHNLTLLRVLDLSVVKFE  
LOV1 539 RLSVHGGNALQSLGQTINKKVRSLIYFAFEDEFCEESTTPCFRSLPLLRVLDLSRVKFE  
Col-0 -----

RPP8 588 GGKLPSSIGGLIHLRYLSLFLAGVSHLPSTMRNLKLLLYLNL SVNNKEPIHVPNVLKEMI  
RCY 588 GGKLPSSIGGLIHLRYLSLCCAGVSHLPSTMRNLKLLLYLNL NVDNEELIHVPNVLKEMI  
HRT 592 GGKLPSSIGGLIHLRYLSLYEAKVSHLPSTMRNLKLLLYLNL DLSVHEEPIHVPNVLKEMI  
LOV1 599 GGKLPSSIGDLIHLRFLSLHRAWISHLPSLRNLKLLLYLNL GFNG--MVHVPNVLKEMO  
Col-0 -----

RPP8 648 QLRYLSLPIKKDDKTKLELGD LVNLEFLFGFSTQHSVTDLLHMTKLRYLAVSL SERCNF  
RCY 648 ELRYLSLPIKMDDKTKLELGD LVNLEFLFGFSTQHSVTDLLHMTKLRYLAVSL SERCNF  
HRT 652 ELRHISLPL-MDDKTKLELGD LVNLEYLRFSTQHSVTDLLRMTKLQYLVSL SERCNF  
LOV1 657 ELRYLQLPMSMHDKTKLELSD LVNLES LMNFSTKYASVMDLLHMTKLRRELSLFTDGS-S  
Col-0 -----

RPP8 708 ETLSSSLRELNRNLETLYVLFSP EIFMVDYMGFVLDHFIHLKELGLAVRMSKIPDQHQLP  
RCY 708 ETLSSSLRELNRNLETLNFLFTPTOTYMVDEHMGV FVLDHFIHLKELGLAVSMSKIPDQHQP  
HRT 711 ETLSSSLRELNRNLES LNFLFTPETYMVVDYMGFVLDHFIHLKELGLAVRMSKIPDQHQP  
LOV1 716 DTLSSSLGQLRSLEV LHL YDRQEP RVAYHGGETV LN-CIHLKELELAT HMPRFPDQYLFH  
Col-0 -----

RPP8 768 PHLAQIYICNCRMEEDPMPILEKLLHLKSVKLT FKAFA GRRMVCSKGGFTQLCALEISEQ  
RCY 768 PHLVHIFLFYCGMEEDPMPILEKLLHLKSVELSNKAFAGRRMVCSKGGFTQLCALEISEQ  
HRT 771 PHLTHIHL LFCRMEEDPMPILEKLLHLKSVQLTDEAFVGS RRMVCSKGGFPQLCALDISKE  
LOV1 775 PHLSHIYLWCCSMEEDPMPILERLLHLKSVILTFGAFV GRRMVCSKGGFPQLCFLKIEEL  
Col-0 -----

RPP8 828 SELEEWIVEEGSMPCLRTLTIHDC EKLKELPDGLKYITSLKELKIEGMKREWKEKLVPGG  
RCY 828 LELEEWIVEEGSMPCLRTLTIHDC KKLKELPDGLKYITSLKELKIEGMKREWKEKLVPGG  
HRT 831 SELEEWIVEEGSMPCLRTLTIHDC EKLKELPDGLKYITSLKELKIEGMKREWKEKLVPGG  
LOV1 835 EELEEWIVEEGSMP LRLALTI CNCRK LK-LPGG I NYITSLKELTIVGMK--WKEKLVPGG  
Col-0 -----

RPP8 888 EDYYKVQH IPDVQFINCDQ  
RCY 888 EDYYKVQH IPDVQFINCDQ  
HRT 891 EDYYKVQH IPDVQFINCDQ  
LOV1 892 EDYYKVQNI PNQFINCDE  
Col-0 -----
